# Supplementary material for: Optical and Thermal Investigations of Eutectic Metallomesogen Mixtures Based on Salicylaldiaminates Metal Complexes with a Large Nematic Stability Range
Source: MDPI journal article supplement (doi:10.3390/inorganics11010032), 2023-01-05
Supplement: s1 [file s1]

# Optical and Thermal Investigations of Eutectic Metallomesogen Mixtures Based on Salicylaldiaminates Metal Complexes with a Large Nematic Stability Range

Hassan-Ali Hakemi<sup>1,†</sup>, Valentina Roviello<sup>2,†</sup> and Ugo Caruso<sup>3,\*</sup>

<sup>1</sup> Plastic Liquid Crystal Technology, Via Lambro 80, 20846 Macherio (MB), Italy

<sup>2</sup> Department of Chemical, Materials and Industrial Production Engineering (DICMaPI), University of Naples Federico II, Naples, 80125, Italy

<sup>3</sup> Department of Chemical Sciences, University of Napoli Federico II, Strada Comunale Cinthia, 26, Napoli, 80126, Italy

\* Correspondence: ugo.caruso@unina.it

† These authors contributed equally to this work.

## Supporting Information

**Table S1.** More relevant <sup>1</sup>H NMR and IR data for ligand and related metal complexes.

| Compound   | 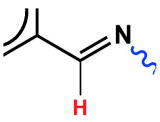 |  |  |  |
|------------|-----------------------------------------------------------------------------------|-----------------------------------------------------------------------------------|------------------------------------------------------------------------------------|-------------------------------------------------------------------------------------|
|            | $\delta$ /ppm <sup>a</sup>                                                        | $\delta$ /ppm <sup>b</sup>                                                        | wavenumber /<br>cm <sup>-1</sup> <sup>c</sup>                                      | wavenumber /<br>cm <sup>-1</sup> <sup>d</sup>                                       |
| 12-8N      | 3.68                                                                              | 10.54                                                                             | 1718                                                                               | 3422                                                                                |
| 12-8NCu    |                                                                                   |                                                                                   | 1726                                                                               | -                                                                                   |
| A11O-6ON   | 3.68                                                                              | 10.54                                                                             | 1708                                                                               | 3431                                                                                |
| A11O-6ONNi | 4.11                                                                              | -                                                                                 | 1728                                                                               | -                                                                                   |
| A11O-6ONPd | 4.13                                                                              | -                                                                                 | 1735                                                                               | -                                                                                   |

<sup>a</sup> TMS chemical shift in ppm of proton of imine; <sup>b</sup> TMS chemical shift in ppm of phenolic proton; <sup>c</sup> IR wavenumber in cm<sup>-1</sup> of proton of imine; <sup>d</sup> TMS chemical shift in ppm of phenolic proton

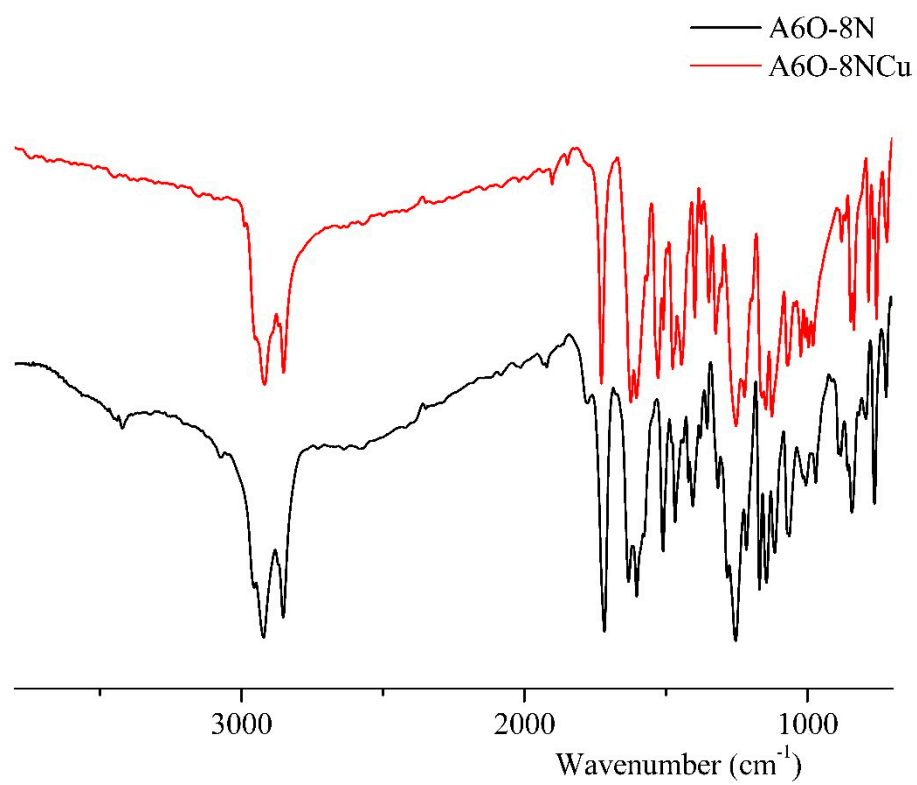

**Figure S1.** FTIR curves for of A6O-8N (black) and A6O-8NCu (red)

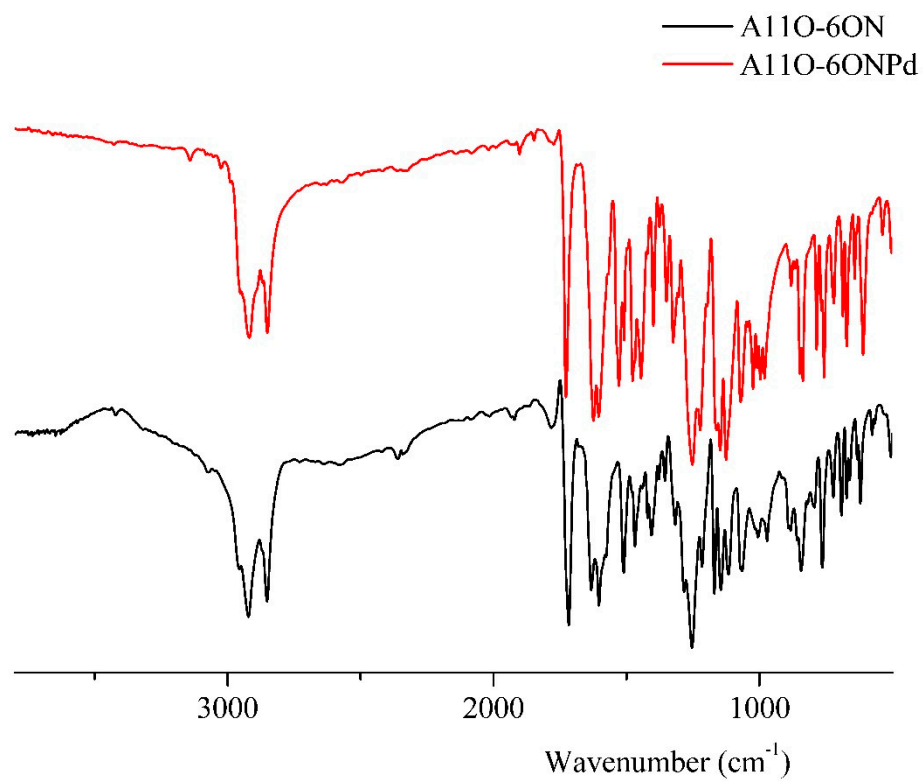

**Figure S2.** FTIR curves for of A11O-6ON (black) and A11O-6ONCu (red)

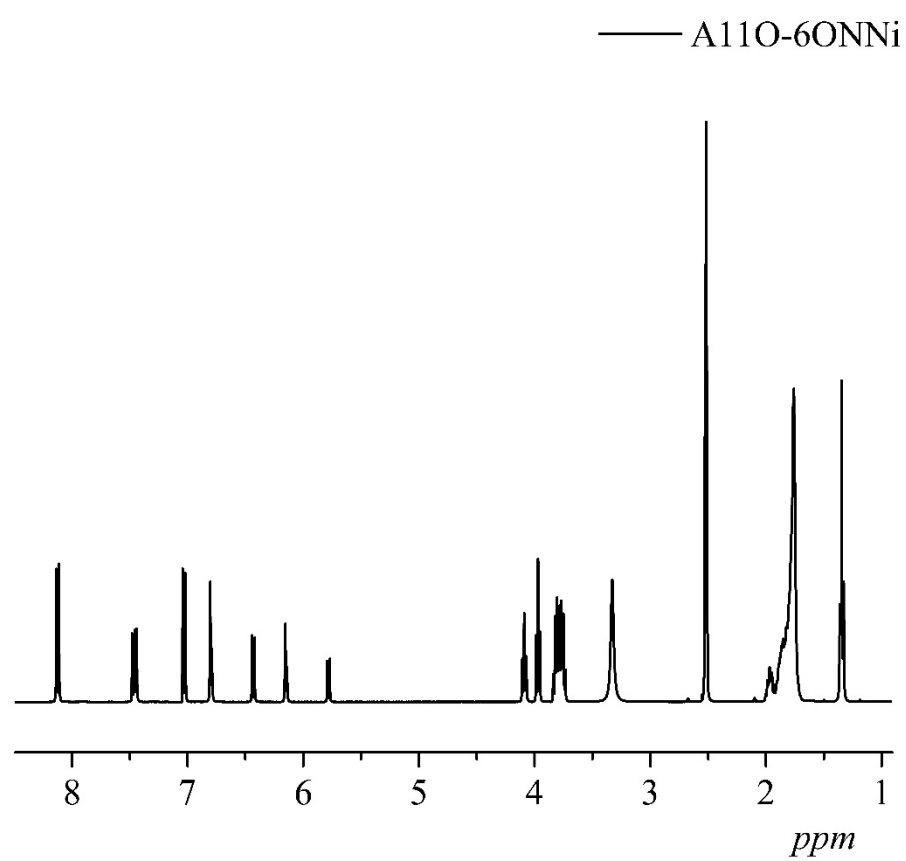

**Figure S3.**  $^1\text{H}$  NMR curves of A11O-6ONNi

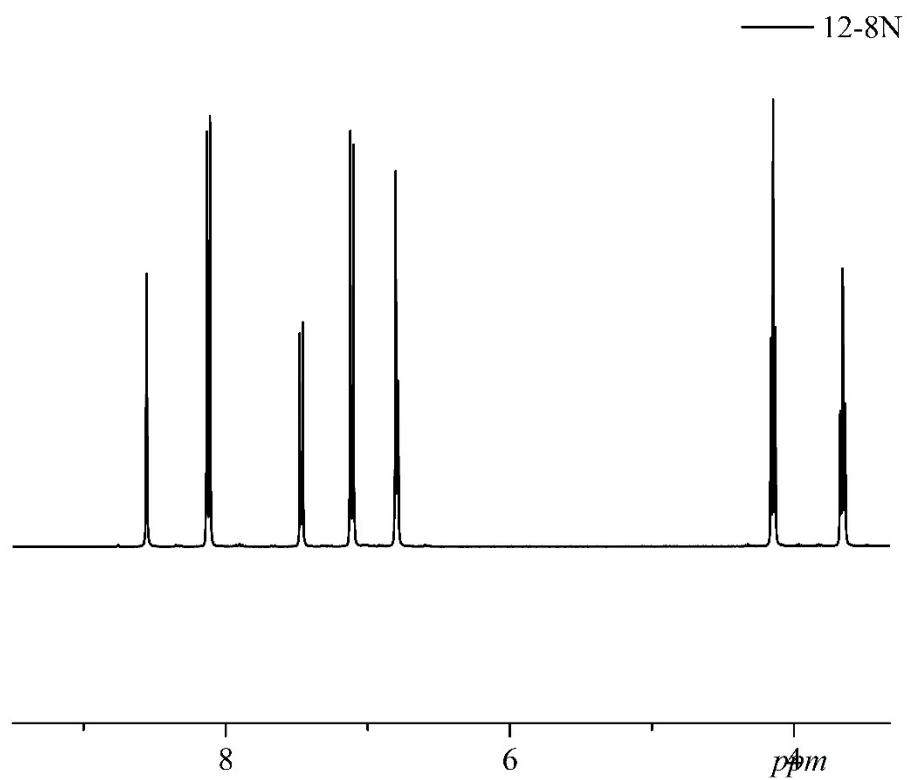

**Figure S4.**  $^1\text{H}$  NMR curves for of 12-8N

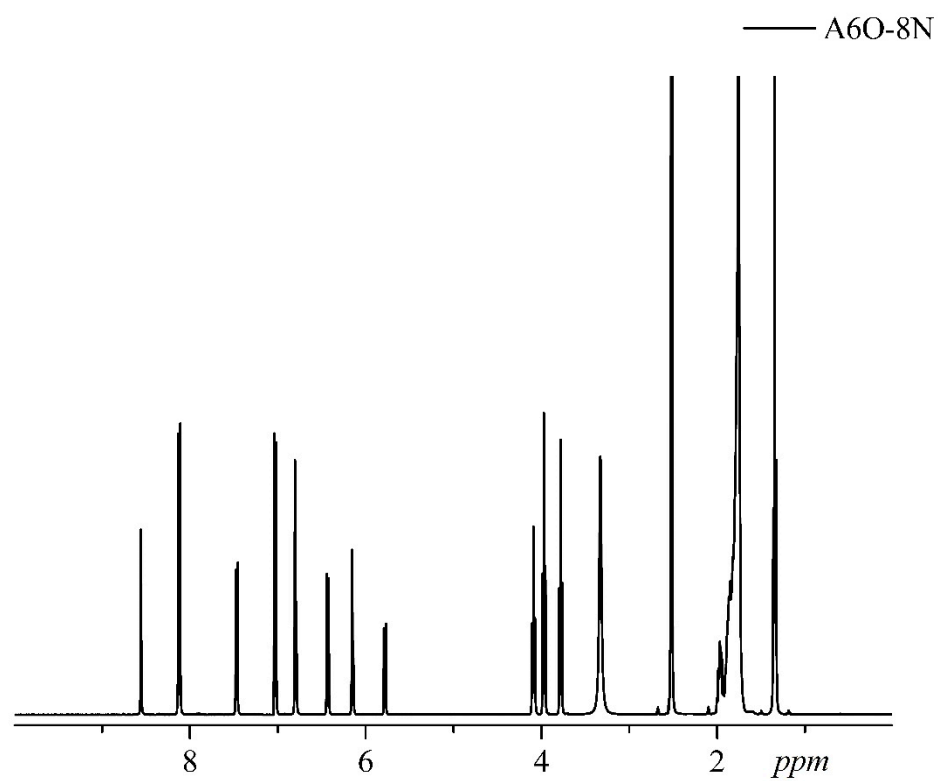

**Figure S5.**  $^1\text{H}$  NMR curves for of A6O-8N

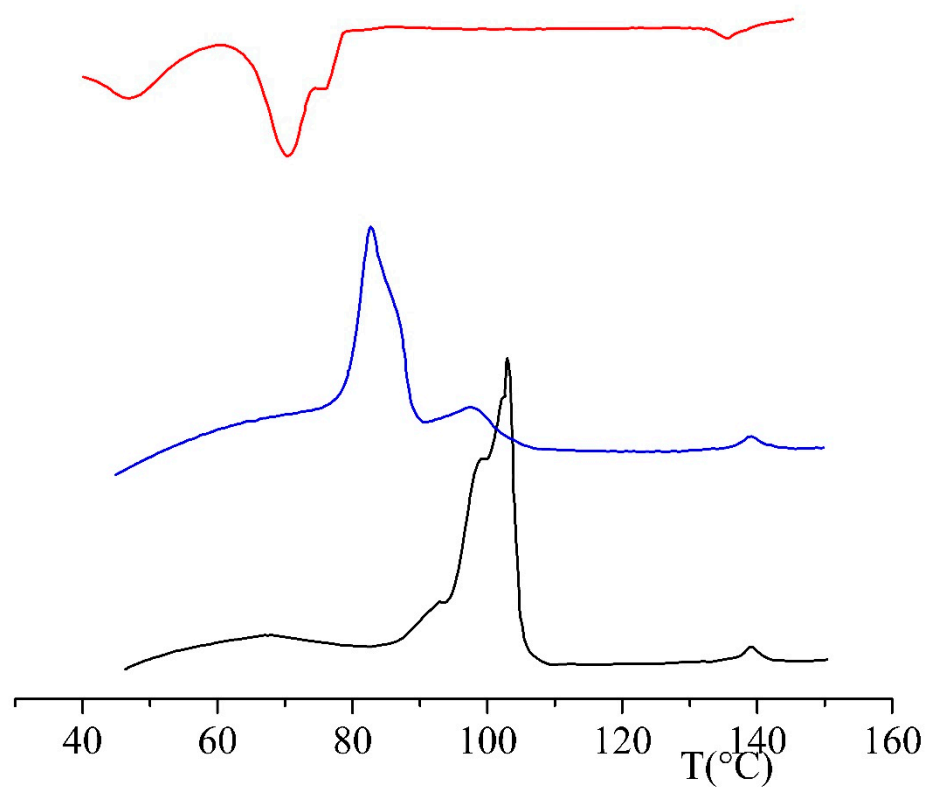

**Figure S6.** DSC thermograms of for A11O-6ONNi/A11O-6ONPd blends with composition of 0.207 wt./wt.: (black) first heating; (red) first cooling run and (blue) second heating run at 10 K/min scanning rate.



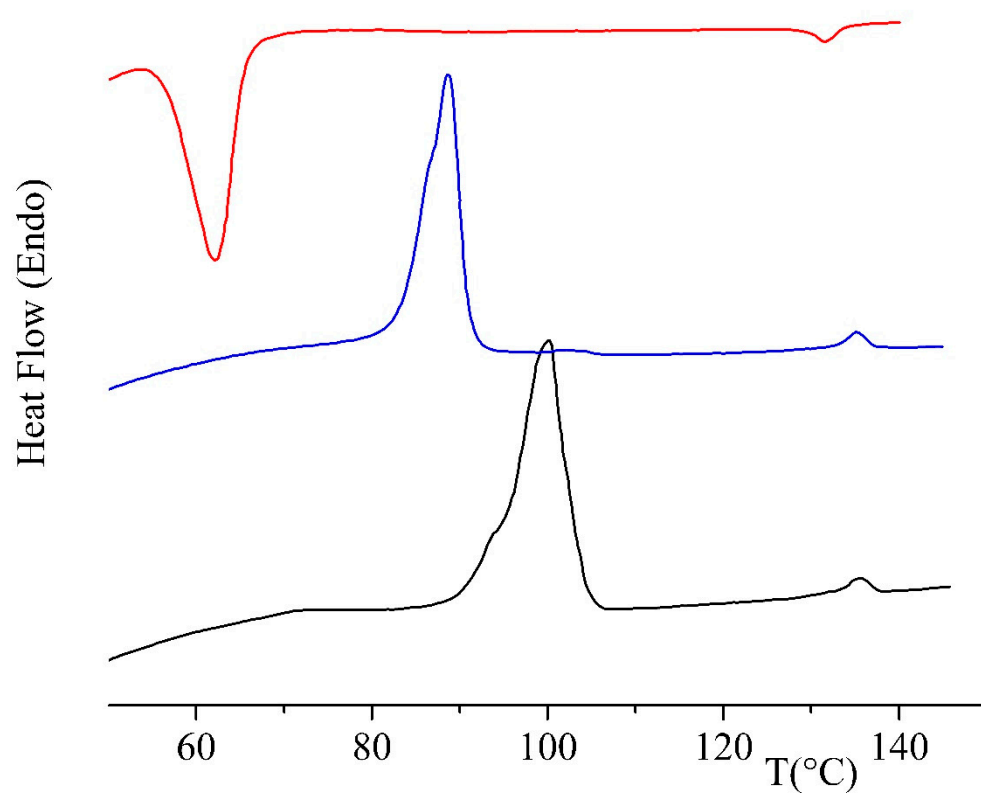

**Figure S7.** DSC thermograms of for A11O-6ONNi/A11O-6ONPd blends with composition of 0.401 wt./wt.: (black) first heating; (red) first cooling run and (blue) second heating run at 10 K/min scanning rate.

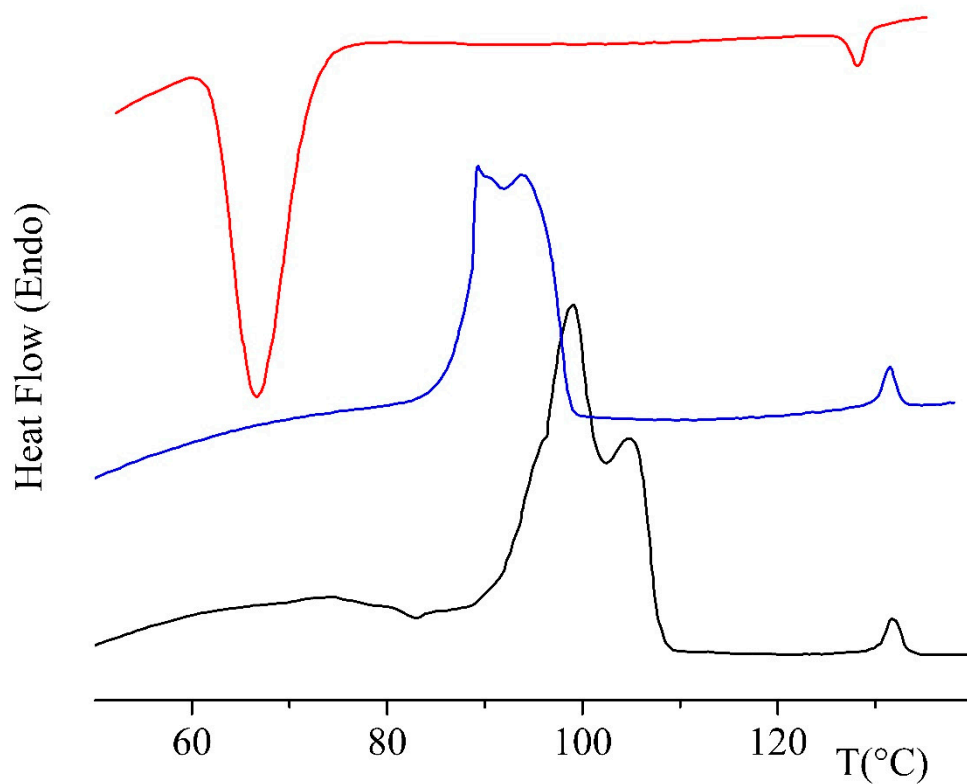

**Figure S8.** DSC thermograms of for A11O-6ONNi/A11O-6ONPd blends with composition of 0.606 wt./wt.: (black) first heating; (red) first cooling run and (blue) second heating run at 10 K/min scanning rate.

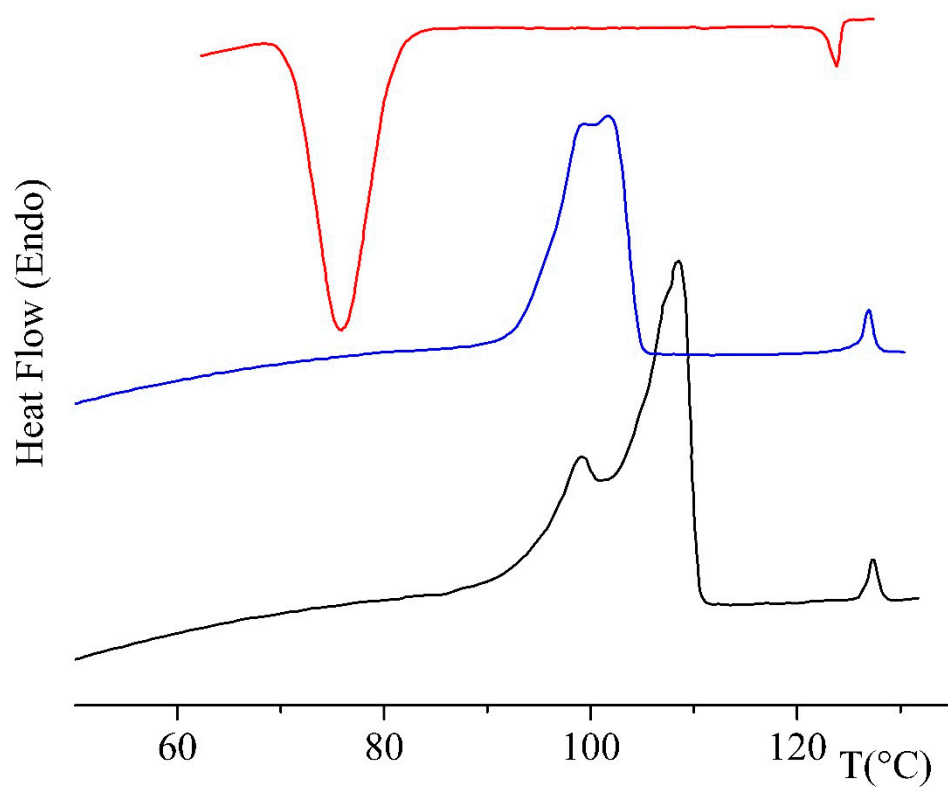

**Figure S9.** DSC thermograms of for A11O-6ONNi/A11O-6ONPd blends with composition of 0812 wt./wt.: (black) first heating; (red) first cooling run and (blue) second heating run at 10 K/min scanning rate.
